# Supplementary material for: “I Go up to the Edge of the Valley, and I Talk to God”: Using Mixed Methods to Understand the Relationship between Gender-Based Violence and Mental Health among Lebanese and Syrian Refugee Women Engaged in Psychosocial Programming
Source: MDPI journal article supplement (doi:10.3390/ijerph18094500), 2021-04-23
Supplement: s1 [file s1]

## Relationship between GBV and Mental Health among Female Survivors in Lebanon

### FGD Guide: Community members

#### Introduction

##### **Important note regarding gender:**

*Given the discussion topic of these focus groups, it is recommended that women and men are separated during focus group discussions. Before commencing the focus group discussion, ensure informed consent is received.*

##### *Important information and introduction<sup>1</sup>*

Hello, my name is \_\_\_\_\_ and I work for \_\_\_\_\_. We have been working in \_\_\_\_ (area) to \_\_\_\_\_ (type of work) for \_\_\_\_ (period). Currently, we are talking to people who we believe understand the dynamics and needs of women in this community. In this discussion, I would like to ask you about various problems people in the community have, their access to service and the accessibility of those services. I would also like to ask how people deal with these problems. The discussion will start with general questions about services and accessibility, and move into more specific questions about violence within your community and how it affects you personally and your mental wellbeing with MH needs accessing services. Our aim is to learn from your knowledge and experience, so that we will be better able to provide support.

1. Our aim is to learn from your knowledge and experience, so that we will be better able to provide support.
2. We cannot promise to give you support in exchange for this interview. We are here only to ask questions and learn from your experiences.
3. You are free to take part or not.
4. If you choose to partake in this discussion, I can assure you that your information will not leave this room, and will only be shared with the people in this room.
5. Though your participation is encouraged, you can step out of the discussion at any point
6. Do you have any questions? Would you like to partake in the discussion?

1. Yes

2. No

##### *FGD Information*

|                                 |                          |
|---------------------------------|--------------------------|
| <b>Date:</b> ____ / ____ / ____ | <b>Facilitator name:</b> |
|---------------------------------|--------------------------|

<sup>1</sup> IASC Reference Group on Mental Health and Psychosocial Support in Emergency Settings. Participatory Assessment II: Perceptions by community members with in-depth knowledge of the community. In: IASC Reference Group Mental Health and Psychosocial Support Assessment Guide, forthcoming. This tool has been reproduced here with permission from the IASC Reference Group.

|                                               |                                  |
|-----------------------------------------------|----------------------------------|
| Note-taker (if available):                    | Location of FGD:                 |
| Number of participants in this group (total): | Area(s) where participants live: |
| Length of FGD (in minutes):                   |                                  |

## Part A General questions about the situation for women in [location]

A.1 What issues are of greatest concern for women in [location]? List as many problems as you can think of.

Note: When using free listing, you keep on encouraging the respondent to give more answers. For example after the respondent has listed a few problems and remains silent, you could ask:

“What other kind of problems do women have in [location]? Please list as many problems that you can think of.”  
The respondent may now list a few more problems. You would then continue with the question until the respondent gives no more answers.

After the list is completed, you should ask for a short description of each problem listed so that the following table (Table 1) can be completed.

**TABLE 1. List of problems (of any kind)<sup>2</sup>**

| Problem | Description |
|---------|-------------|
| 1.1.1   |             |
| 1.1.2   |             |
| 1.1.3   |             |
| 1.1.4   |             |
| 1.1.5   |             |
| 1.1.6   |             |
| 1.1.7   |             |
| 1.1.8   |             |
| 1.1.9   |             |
| 1.1.10  |             |
| 1.1.11  |             |
| 1.1.12  |             |

<sup>2</sup> IASC.

|        |  |
|--------|--|
| 1.1.13 |  |
| 1.1.14 |  |
| 1.1.15 |  |
| 1.1.16 |  |
| 1.1.17 |  |
| 1.1.18 |  |
| 1.1.19 |  |
| 1.1.20 |  |

A.2 **Facilitator:** look at the responses to question A.1 and follow the instructions below to select mental health and psychosocial problems specifically. Explain to the participants that you are doing this.

Select those problems which are especially relevant from a mental health / psychosocial perspective, such as:

Problems related to social relationships (domestic and community violence, child abuse, family separation); and

(b) Problems related to:

- Feelings (for example feeling sad or fearful);
- Thinking (for example worrying); or
- Behavior (for example drinking).

Copy these into Table 1.2 below.<sup>3</sup>

| TABLE 1.2 LIST OF MENTAL HEALTH/PSYCHOSOCIAL PROBLEMS | POSSIBLE CAUSES |
|-------------------------------------------------------|-----------------|
| 1.2.1                                                 |                 |
| 1.2.2                                                 |                 |
| 1.2.3                                                 |                 |
| 1.2.4                                                 |                 |
| 1.2.5                                                 |                 |
| 1.2.6                                                 |                 |
| 1.2.7                                                 |                 |
| 1.2.8                                                 |                 |
| 1.2.9                                                 |                 |

<sup>3</sup> IASC.

1.2.10

Once you (as a facilitator) have filled these out, ask about the top three priority problems, and highlight or underline them in a different color marker.

A.3 What are the different types of violence that women face within your community?

A.4 What do you think are the linkages between GBV and MH for women within your community?

A.4a If participants find difficulty answering this question, draw a flow-chart that will assist them for different kinds of GBV and their relationship to mental health. **(Only use if participants are not able to answer A.4 easily, as this takes time)**

Example:

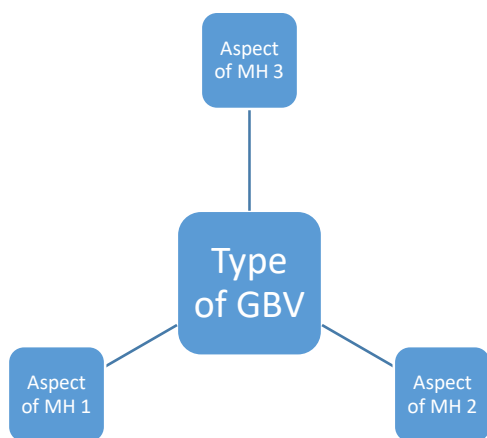

This chart can be drawn for different kinds of GBV and how they might affect different aspects of mental health. In order to construct them, first ask what types of GBV there are in the community, and categorize them (e.g. hitting and choking are both physical violence). Then ask them about the different aspects of mental health (e.g. behavior, feelings, self-confidence, ability to conduct everyday tasks, ability to maintain healthy relationships, overall satisfaction with life, coping with adversity, etc. Construct several charts with type of GBV in the center and the aspects of MH branching out of it. Ask: how might this type of GBV affect [aspect of MH]?

## Part B Services and service accessibility

B.1 Facilitator: based on the above, give an example of a woman who might be experiencing the above issues. Give this woman a name, an age, and geographical residence/house type, then list the issues that she might have (based on examples given above). Then, ask the participants: what services are available in your area would you refer this woman to in order to address these issues? These services can be informal (family, friends, informal educational structures, community centers), or formal (hospitals, service provision centers, clinics)

*Example: Farah (24, from Syria, living in informal tent settlement), confided in you that she was distressed because her brother didn't have a job and couldn't provide for the family. She also told you that she has not been able to access medical services for her chronic illness, and she and her family couldn't afford medical care. What services would you recommend to her in the area? Other examples of issues that might arise: lack of access to enough food/water/warm clothes, inter-marital issues resulting in violence, lack of access to education, leaving children at home, inability to go see friends/seek psychosocial support because of abusive partner, etc.*

B.1a To whom are these services being provided, and in what way? (Probe: clinics, community centers, home visits, openly). Types of services might be health, PSS, case management, legal, protection/security, sensitization/prevention, basic emotional support, group activities, food aid, shelter, education, hygiene, etc. Have participants draw do a social mapping activity.

*How to: ask participants to draw basic map of the area(s) they work in, placing the different services offered in that area on the map. Colored stickers should show the type of service, and where it's located. Sticky notes under them should note who those services are targeted toward, and who has most access to them.*

B.2 What's the best way to provide/disseminate information to [woman from story above] and other women about services in your community?

B.2a Have service providers been effective in reaching women with this information? GBV survivors?

B.2a1 How do you think this information should be distributed to different target groups (men, women, adolescents, people with disabilities, people with specific MH needs)?

B.3 Do you feel comfortable seeking these services? Do you feel that GBV survivors are comfortable seeking them?

B.4 What kind of barriers exist for women in general to access these services? (Probe: geographical, security barriers, familial/societal barriers, not enough services, etc.). (Probe: geographical, security barriers, familial/societal barriers, etc.). As participants give answers to B.4 and B.4a, fill out the table below, then ask for the top 3 barriers, highlighting/underlining them in a different color.

B.4a What can be done to improve this?

| TABLE 1.4 LIST OF BARRIERS TO SERVICES FOR GBV SURVIVORS WITH MH CONSIDERATIONS | POSSIBLE SOLUTIONS |
|---------------------------------------------------------------------------------|--------------------|
| 1.2.1                                                                           |                    |
| 1.2.2                                                                           |                    |
| 1.2.3                                                                           |                    |
| 1.2.4                                                                           |                    |
| 1.2.5                                                                           |                    |
| 1.2.6                                                                           |                    |
| 1.2.7                                                                           |                    |
| 1.2.8                                                                           |                    |
| 1.2.9                                                                           |                    |
| 1.2.10                                                                          |                    |

### Part C Specific questions about GBV survivors with specific mental health needs

C.1 What issues are of greatest concern for women GBV survivors with specific MH needs in [location]? List as many problems as you can think of. Facilitator: write these problems in this table. GBV can include physical violence (e.g. hitting, pushing, stabbing, other harmful acts that physical harm a woman), emotional/psychological violence (e.g. humiliating, banning women from seeing their family/friends, intimidation, and isolation), sexual violence (performing sexual acts of any kind against a person's will or without their consent), and/or economic violence (e.g. preventing women from accessing monetary resources or making any decisions related to money, not allowing women money for basic needs such as water or food, or personal needs). Mental health needs may include symptoms of depression, anxiety, psychotic/neurotic disorders, distress, toxic stress, and other symptoms for which women may need support or intervention.

| Problem | Description |
|---------|-------------|
| 1.1.1   |             |
| 1.1.2   |             |
| 1.1.3   |             |
| 1.1.4   |             |
| 1.1.5   |             |
| 1.1.6   |             |
| 1.1.7   |             |
| 1.1.8   |             |
| 1.1.9   |             |
| 1.1.10  |             |
| 1.1.11  |             |
| 1.1.12  |             |
| 1.1.13  |             |
| 1.1.14  |             |
| 1.1.15  |             |
| 1.1.16  |             |
| 1.1.17  |             |
| 1.1.18  |             |
| 1.1.19  |             |
| 1.1.20  |             |

C.1a Do these differ from the issues that other women face?

C.1b If so, how? And do there need to be specific services for this target group? (If so, probe on what kind of services, and their availability).

C.1b1 If these services are available, are women GBV survivors with specific MH needs comfortable seeking these services?

C.2 Facilitator: based on the above, give an example of a woman who might be experiencing the above issues. Give this woman a name, an age, and geographical residence/house type, then list the issues that she might have (based on examples given above). Then, ask the participants: what barriers might exist specifically for this woman, and other women GBV survivors with MH needs to access the services we spoke about?

*Example: Lama (37, from Lebanon, living in rural area), confided in you that she was experiencing panic attacks every week and can't get out of bed most days. She told you that her father has become an angry man, and that he pushes her and humiliates her in front of her family because she is unwed. Lama feels unsafe walking in the streets alone because she has experienced sexual assault and harassment from her neighbors, and that her down syndrome is a source of ridicule. What services would you recommend to her in the area? Other examples of issues that might arise for some women: lack of access to psychosocial support for distress, inter-marital issues resulting in violence, lack of access to money for basic or personal needs, inability to go see friends/seek psychosocial support because of abusive partner, etc.*

C.1a What are some ways to work on overcoming these barriers?

C.1b What can be done specifically by community leaders/service providers to do so?

## Part D Community coping mechanisms

D.1 Finally, we are going to talk about some of the coping mechanisms employed in your community. Can you please list below the MH/psychosocial problems mentioned in Table 1.2 (facilitator: keep this table visible, and read out prioritized answers if necessary), as well as the coping mechanism most commonly seen for women survivors of GBV with MH considerations.

TABLE 1.4 Coping mechanisms<sup>4</sup>

| Mental health/ psychosocial problems (as listed in 1.2) | Coping | Is the coping method helpful? |
|---------------------------------------------------------|--------|-------------------------------|
| 1.2.1                                                   | 3.2.1  | Yes/No                        |
| 1.2.2                                                   | 3.2.2  | Yes/No                        |
| 1.2.3                                                   | 3.2.3  | Yes/No                        |
| 1.2.4                                                   | 3.2.4  | Yes/No                        |

<sup>4</sup> IASC.

|       |       |        |
|-------|-------|--------|
| 1.2.5 | 3.2.5 | Yes/No |
| 1.2.6 | 3.2.6 | Yes/No |

## CONCLUDE THE DISCUSSION<sup>5</sup>

---

- Thank participants for their time and their contributions
- Remind participants that the purpose of this discussion was to better understand the needs and concerns of women and girls since the crisis
- Remind participants of their agreement to confidentiality
- Remind participants not to share information or the names of other participants with others in the community
- Ask participants if they have questions
- If anyone wishes to speak in private, respond that the facilitator and secretary will be available after the meeting

---

<sup>5</sup> IRC (2011). IRC Assessment ToolKit.
